# Supplementary material
Source: MDPI journal article supplement (https://www.mdpi.com/2673-6284/12/2/43)
Supplement: s1 [file s1]

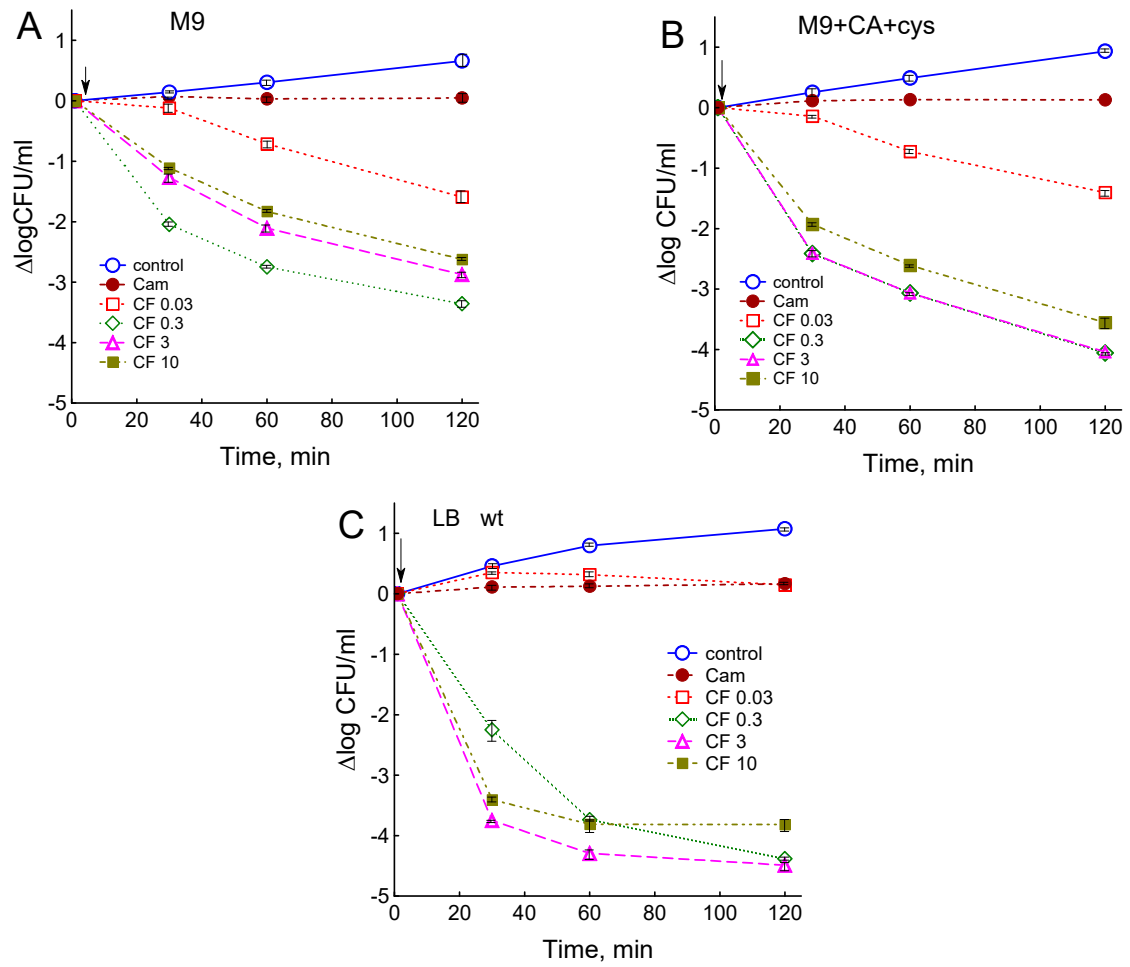

**Figure S4.** Changes in CFU under the action of chloramphenicol (Cam, 25  $\mu\text{g/ml}$ ) and ciprofloxacin (CF, 0.03, 0.3, 3, and 10  $\mu\text{g/ml}$ ) in different media. **(A)** Minimal M9 medium. **(B)** M9 supplemented with casamino acids and cystine (M9+CA+cys). **(C)** LB medium. The time of antibiotic addition is indicated by the arrow.
