# Supplementary material
Source: MDPI journal article supplement (https://www.mdpi.com/2673-6284/12/2/43)
Supplement: s1 [file s1]

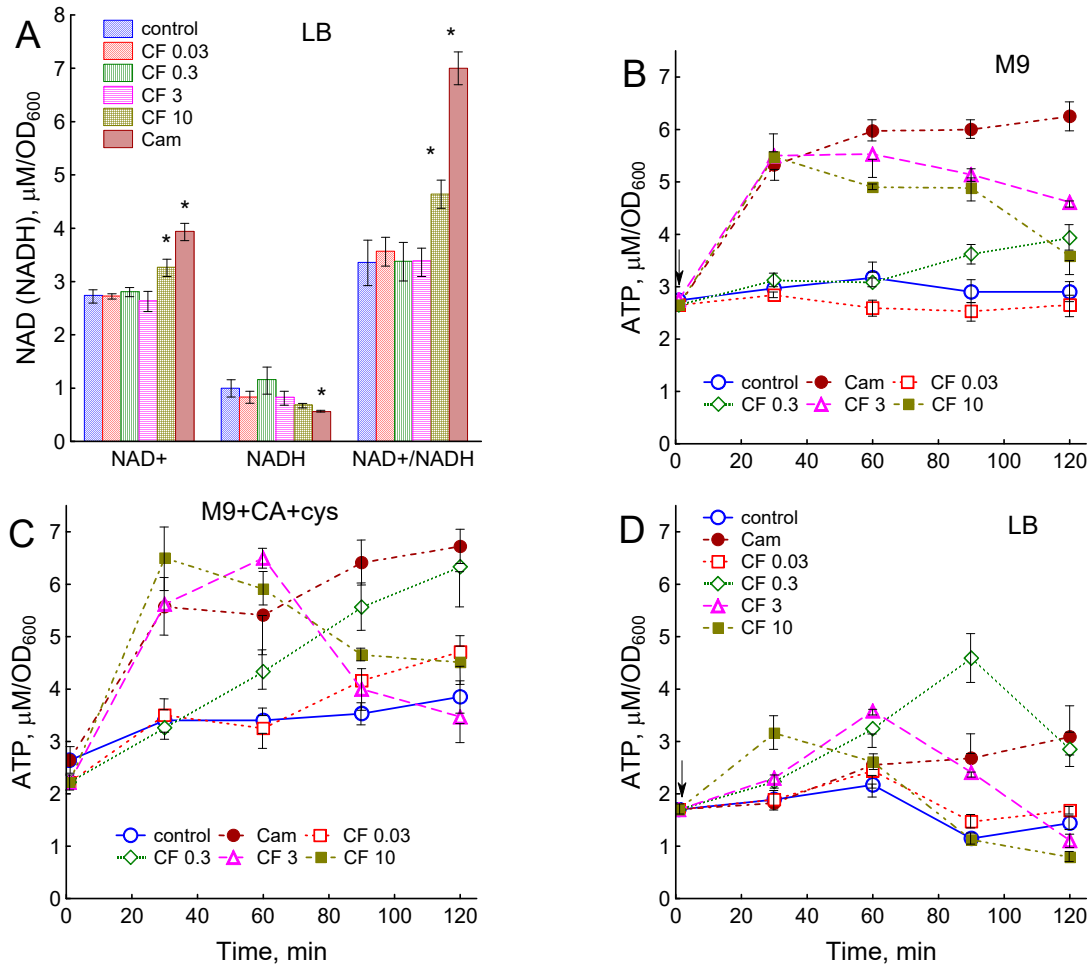

**Figure S3.** The effect of chloramphenicol and ciprofloxacin on the NAD/NADH ratio and ATP level during *E. coli* growth in different media. (A) NAD/NADH in LB medium. (B) ATP in M9 medium. (C) ATP in M9+CA+cys medium. (D) ATP in LB medium.
