# Supplementary material
Source: MDPI journal article supplement (https://www.mdpi.com/2673-6284/12/2/43)
Supplement: s1 [file s1]

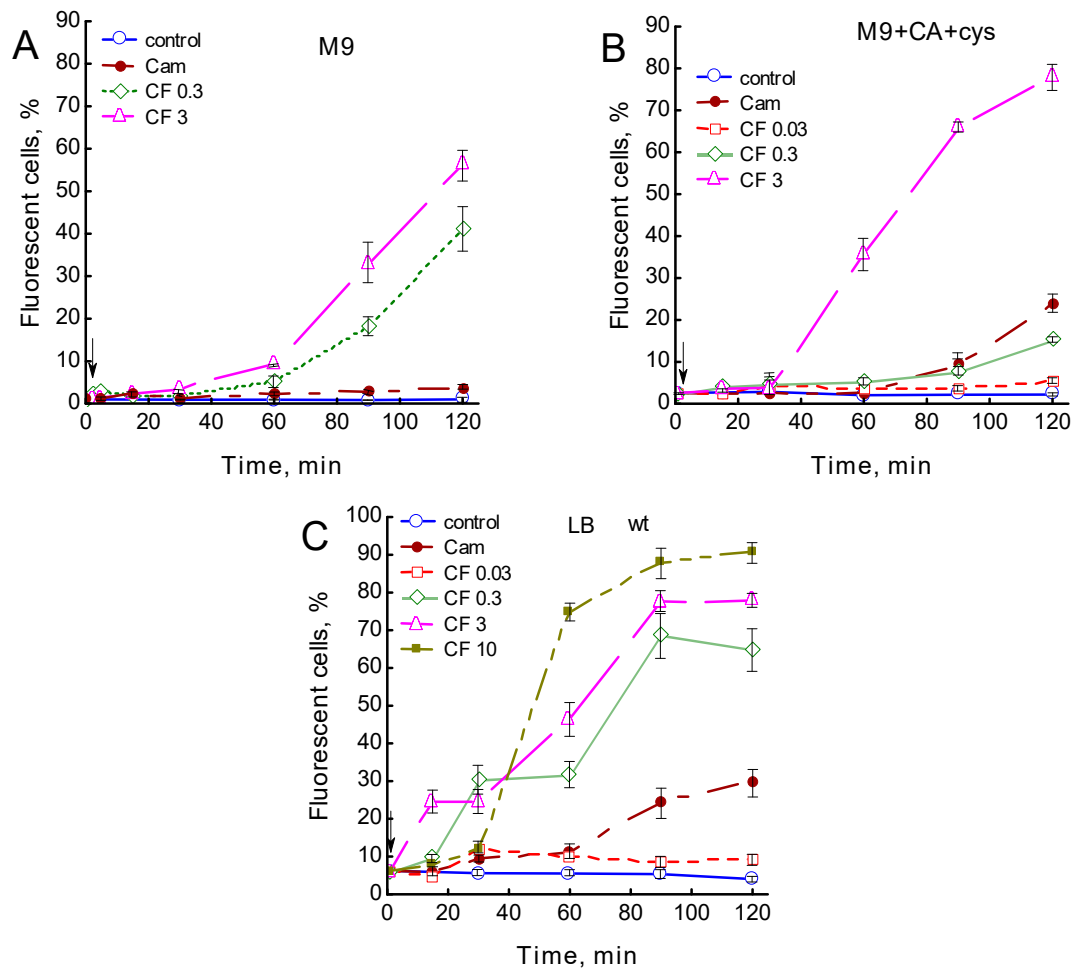

**Figure S1.** Changes in the number of depolarized cells (stained with fluorescent dye DiBAC) during exposure to antibiotics in different media. **(A)** minimal M9 medium; **(B)** M9 supplemented with casamino acids and cystine (M9+CA+cys); **(C)** LB medium. Chloramphenicol (Cam, 25  $\mu\text{g/ml}$ ) and ciprofloxacin (CF, 0.03, 0.3, 3 and 10  $\mu\text{g/ml}$ ) were added at the point indicated by the arrow.
