# Supplementary material
Source: MDPI journal article supplement (https://www.mdpi.com/2673-6284/12/2/43)
Supplement: s1 [file s1]

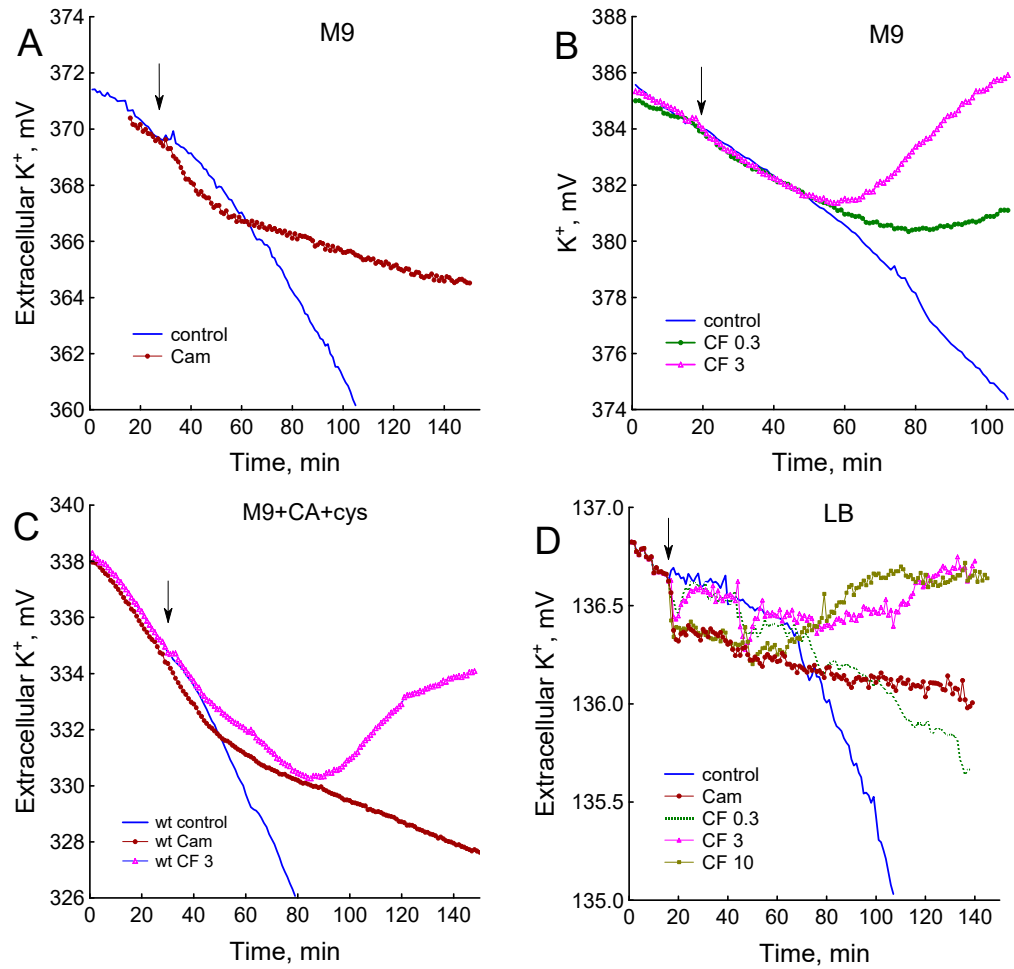

**Figure S2.** Effect of chloramphenicol (**A**) and ciprofloxacin (**B**) on  $K^+$  uptake by *E. coli* BW25113 cells during growth in M9 medium (**A**, **B**), in M9+CA+cys medium (**C**) and in LB medium (**D**). 25  $\mu$ g/ml chloramphenicol or 0.3 and 3  $\mu$ g/ml ciprofloxacin were added at the time indicated by the arrow.
